# Supplementary material
Source: MDPI journal article supplement (https://www.mdpi.com/2673-4591/6/1/24)
Supplement: s1 [file s1]

# Impedance characterization of particles one by one using a nanosensor electronic platform

Diana Isabel Sandoval Bojórquez<sup>a</sup>, Eduardo Sergio Oliveros Mata<sup>b</sup>, Julian Schütt<sup>b</sup>, Michael Bachmann<sup>a</sup>, Larysa Baraban<sup>a</sup>

<sup>a</sup>Helmholtz-Zentrum Dresden-Rossendorf (HZDR), Institute of Radiopharmaceutical Cancer Research, Dresden, Germany;

<sup>b</sup>Helmholtz-Zentrum Dresden-Rossendorf (HZDR), Institute of Ion Beam Physics and Materials Research, Dresden, Germany

## Introduction

- The on-chip integration of nanostructures for biosensing is becoming a promising approach for label-free measurements [1].
- Impedance cytometry allows the electric characterization of colloids in a highly miniaturized way.
- By measuring the electrical properties of particles in suspension, the dielectric characteristics of particles can be determined [2].

## Results

### Impedimetric chip

- Interdigitated gold nanowires of 100 nm in width and 50  $\mu\text{m}$  in length were fabricated by EBL.
- An AC signal (500 mV) is applied between the sensing elements at a fixed frequency (100 kHz) using a lock-in amplifier.
- The changes in amplitude and phase of the applied signal are measured with the lock-in amplifier.
- Real-time monitoring of silica particles (sizes: 3  $\mu\text{m}$ , 5  $\mu\text{m}$ , and 10  $\mu\text{m}$ ) flowing over the sensing area was achieved.

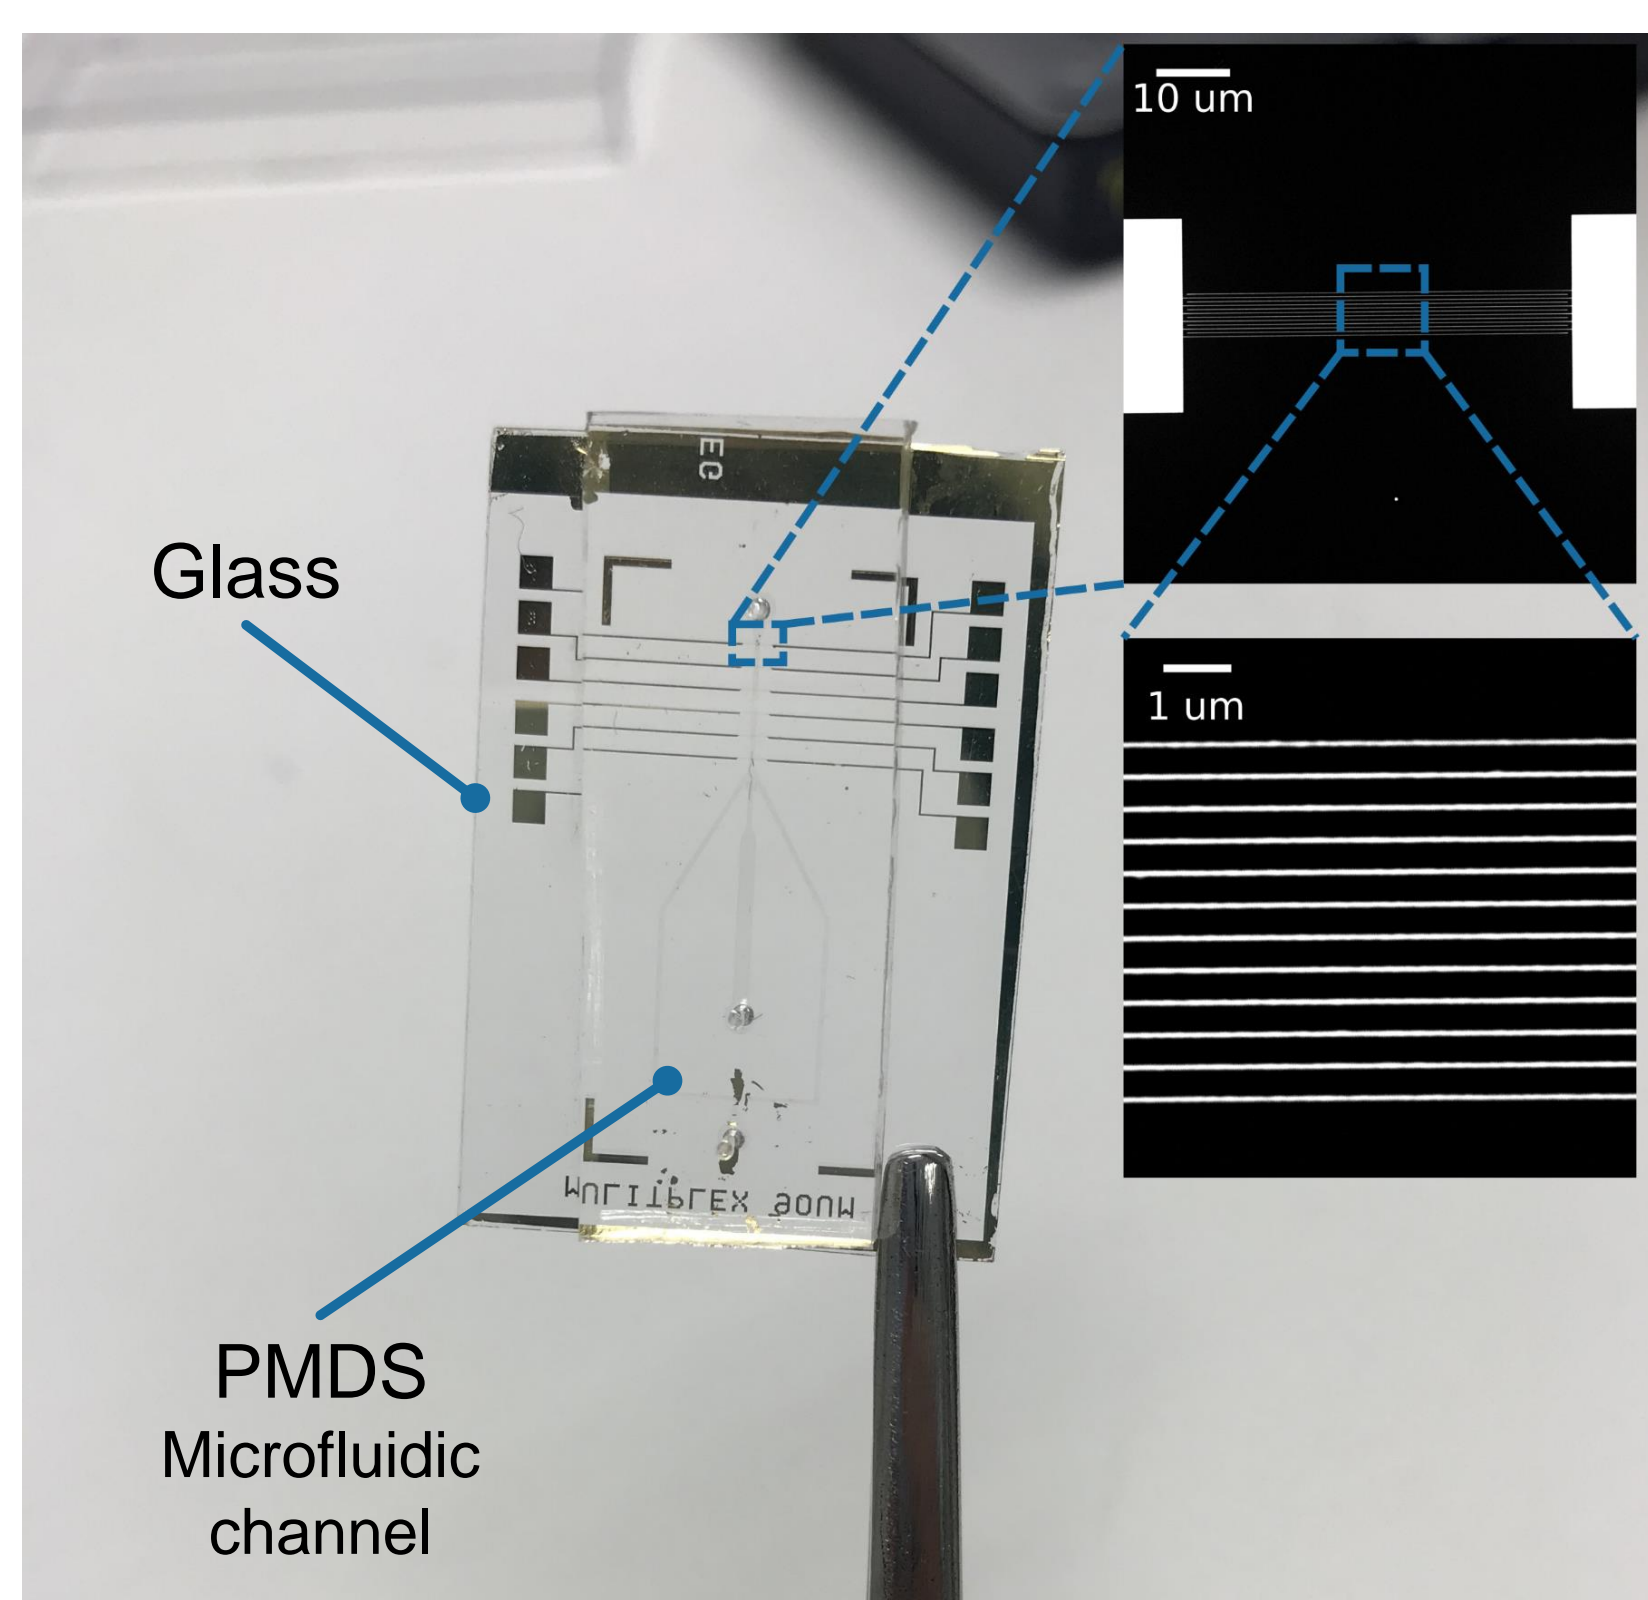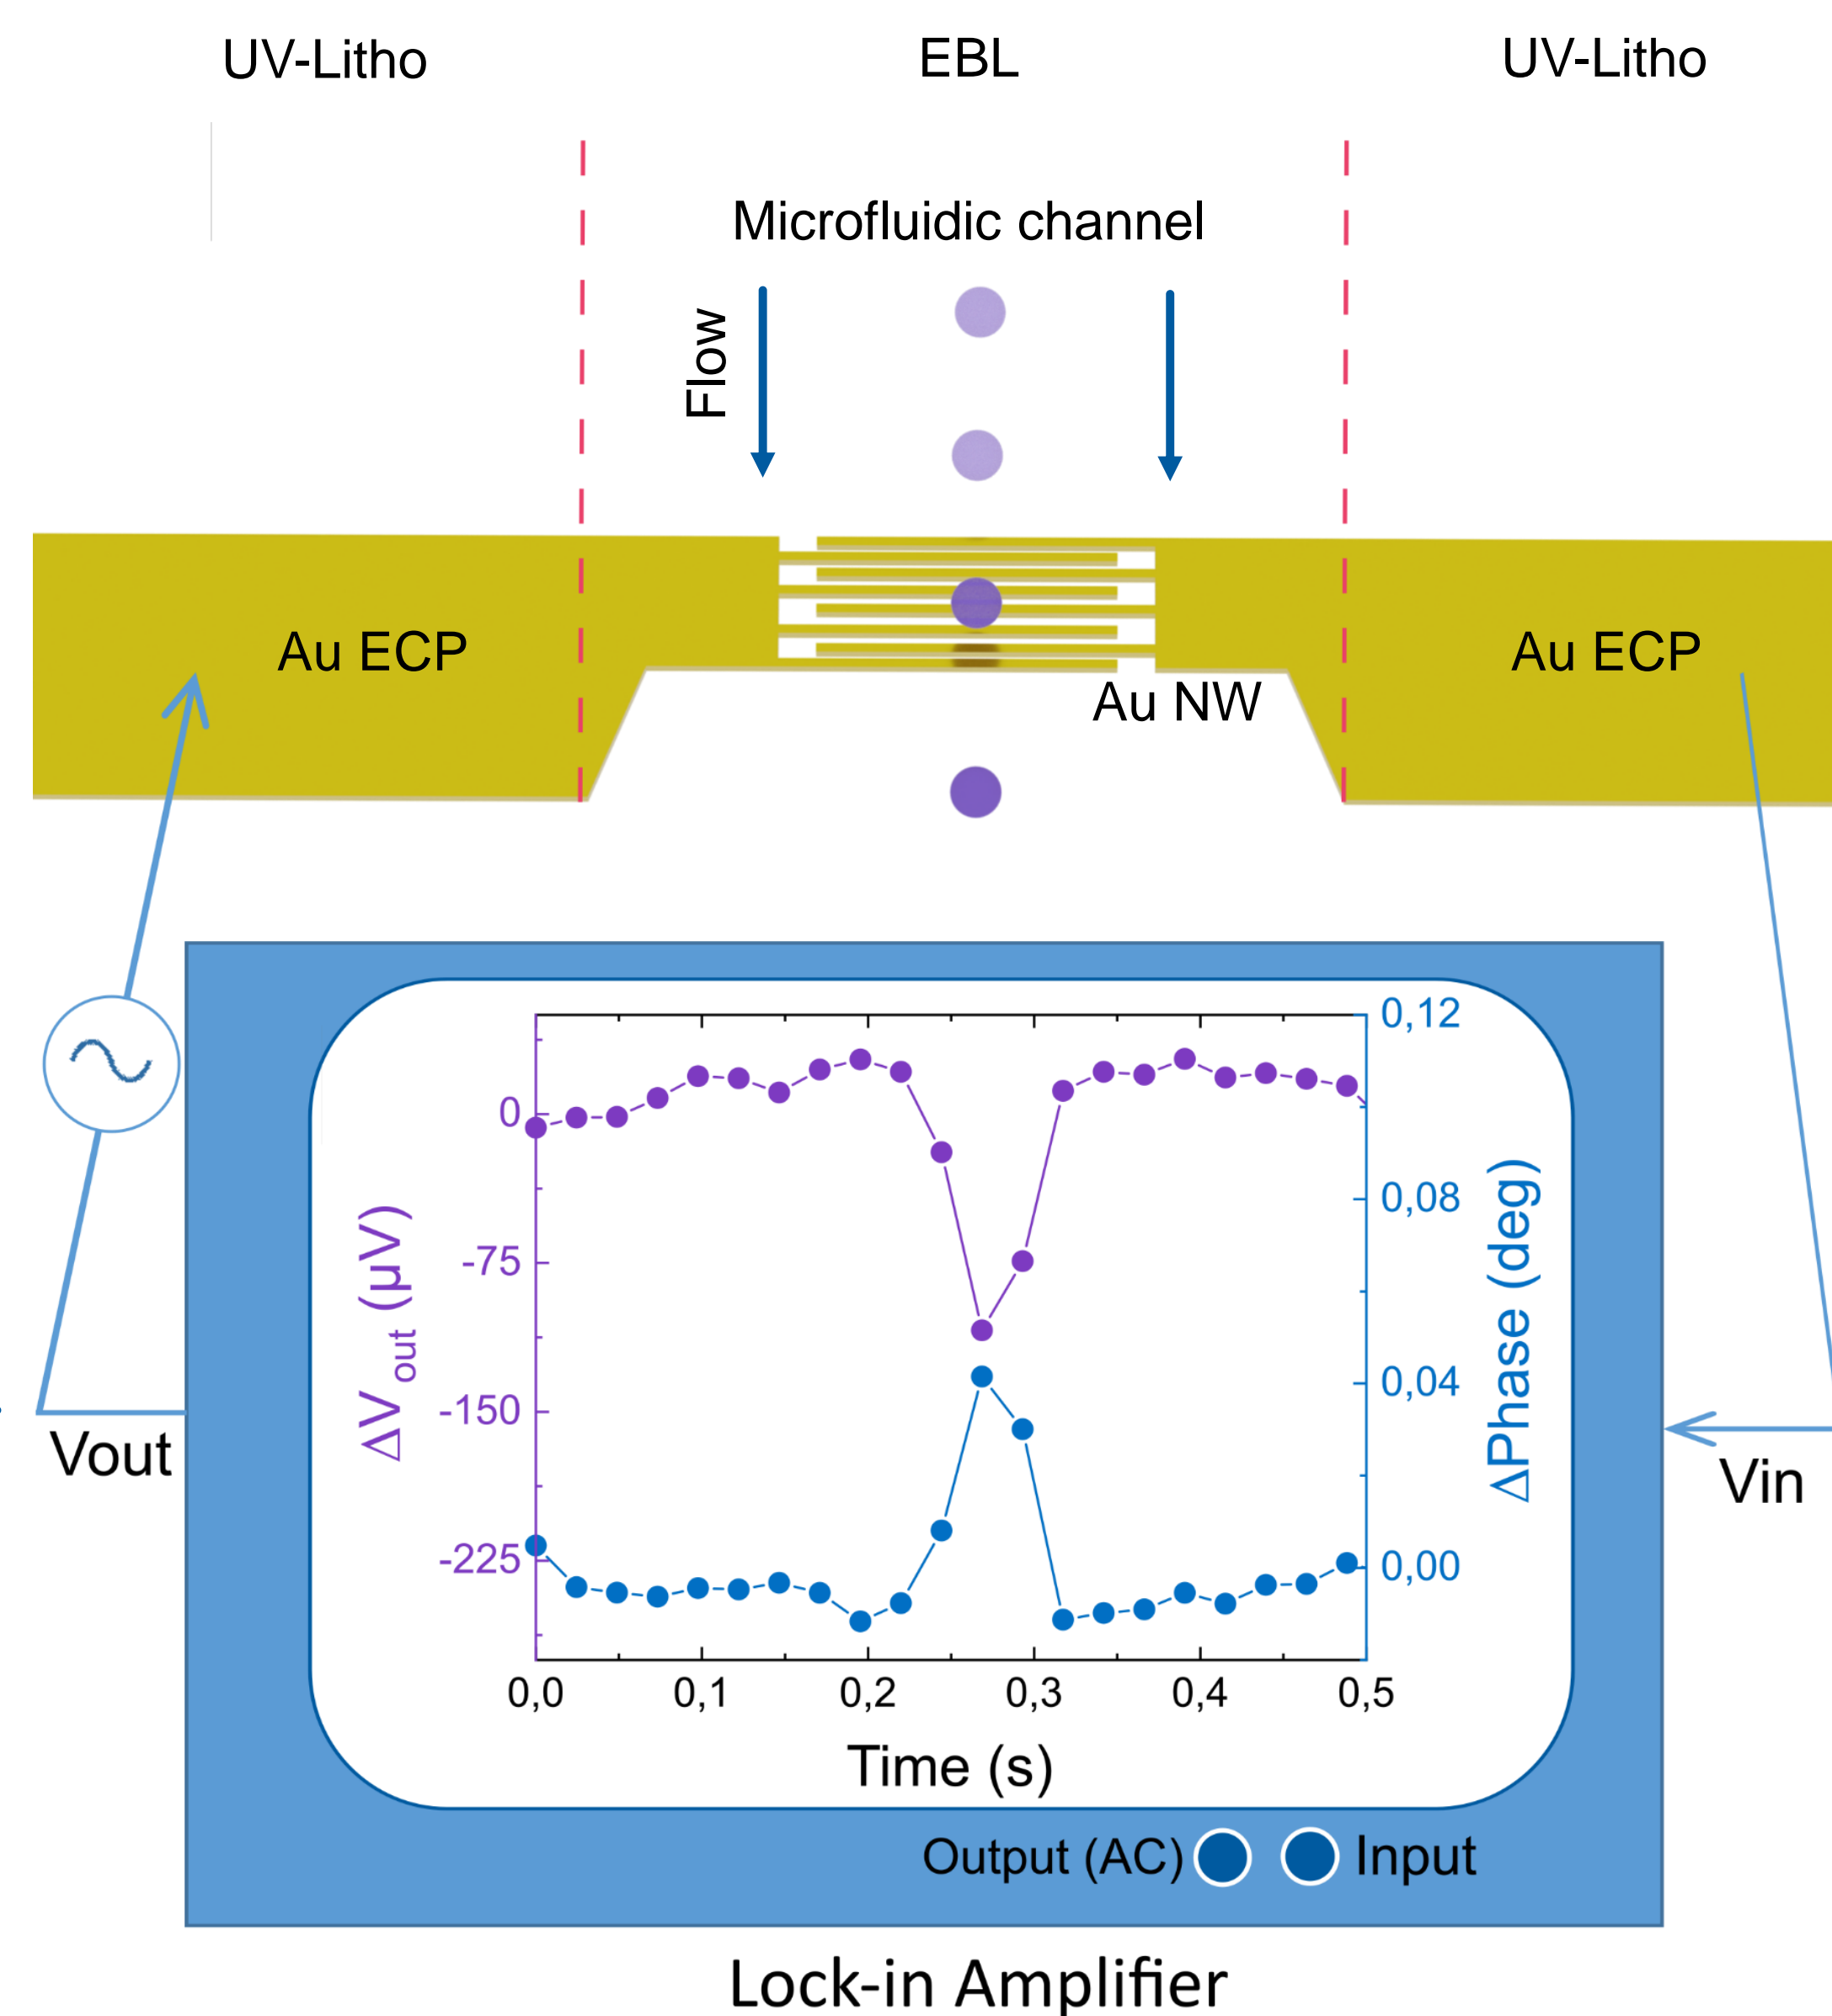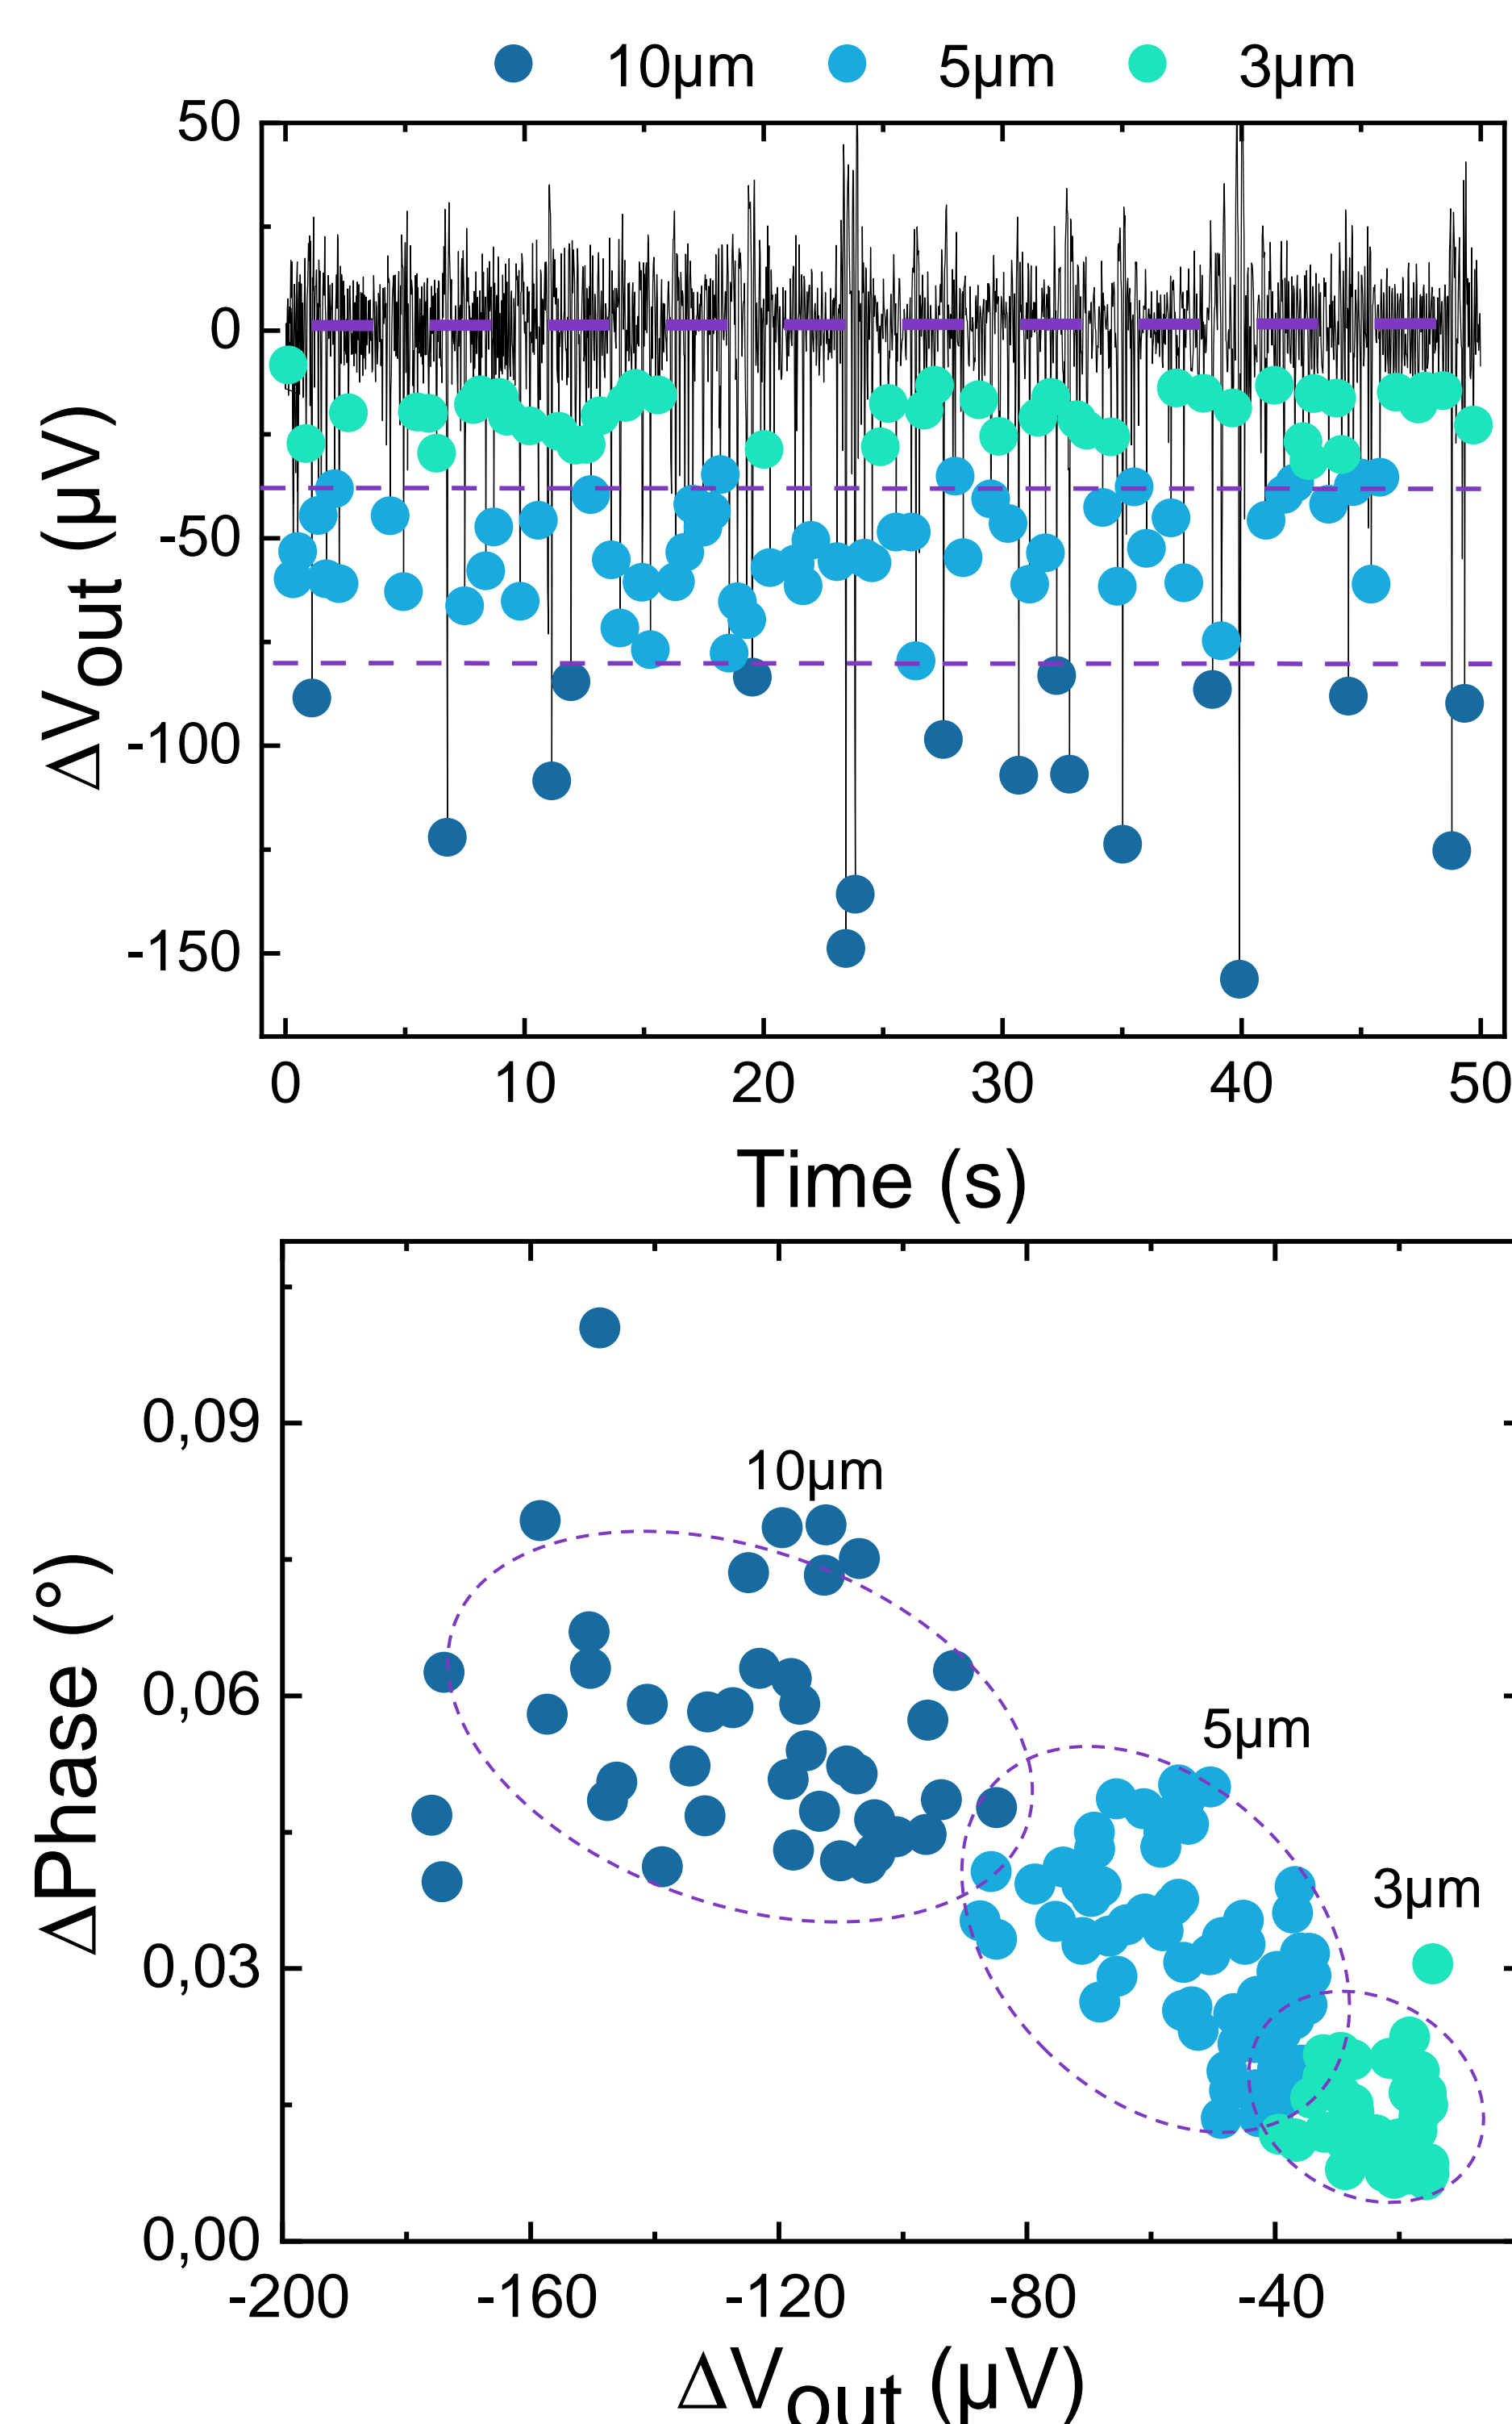

## Methods

Fabrication of the impedimetric chip:

- The interdigitated gold nanowires (NW) were fabricated by electron beam lithography (EBL).
- The external contact pads (ECP) that allow the connection with the measuring device (lock-in amplifier) were fabricated by standard UV-lithography.
- The microfluidic channel (200  $\mu\text{m}$  width, 15  $\mu\text{m}$  height) that allows the flow of particles over the sensing area was fabricated by soft-lithography using SU-8 structures to make the PDMS replica containing the channel.

### Single-particle detection events

- When a particle reaches the sensing area, there is a voltage drop of the signal and, at the same time, a phase shift can be observed.
- As soon as the particle leaves the sensing area, the signal stabilizes back to the baseline value.

### Detection of particles of different sizes

- A complex mixture containing particles of different sizes (sizes: 3  $\mu\text{m}$ , 5  $\mu\text{m}$ , and 10  $\mu\text{m}$ ) was tested with the impedimetric platform. The signal change induced by a particle passing over the sensing area is size-dependent. Particles of 3  $\mu\text{m}$ , 5  $\mu\text{m}$ , and 10  $\mu\text{m}$  show a mean  $\Delta V_{\text{out}}$  of -19  $\mu\text{V}$ , -52  $\mu\text{V}$  and -108  $\mu\text{V}$ , and a mean  $\Delta\text{Phase}$  of 0.015°, 0.03° and 0.06°, respectively.
- This leads to a size-discrimination of the analytes based on the detection signal.

### Scatter plot representation

- Each detection event is plotted according to its change in amplitude and phase.
- Bigger particles (10  $\mu\text{m}$  in diameter) produced higher signal change compared to smaller particles (5  $\mu\text{m}$  and 3  $\mu\text{m}$ ), however they show the higher signal dispersion.
- This representation allows to identify clusters and data patterns.

## Conclusions and Outlook

- It was possible to fabricate a platform for detection of single-particle events.
- A complex mixture containing particles of different sizes was measured and it was possible to discriminate them based on the detection signal.
- The scatter plot representation allows for a clear identification of cluster formation and data pattern analysis.
- This platform could be a powerful tool for the detection of different cell subpopulations in a highly miniaturized way [3].

## Acknowledgments

We would like to thank the support from the NanoFaro team and the department of Intelligent Materials and Devices from HZDR.

## References

- [1] Bhatt G, Bhattacharya S. Biosensors on chip: A critical review from an aspect of micro/nanoscales. *Journal of Micromanufacturing*. 2019;2(2):198-219.
- [2] Petrovsky V, Manohar A, Dogan F. Dielectric constant of particles determined by impedance spectroscopy. *Journal of Applied Physics*. 2006;100(1):014102.
- [3] Schütt J, Sandoval Bojórquez D, Avitabile E, Oliveros Mata E, Milyukov G, Colditz J et al. Nanocytometer for smart analysis of peripheral blood and acute myeloid leukemia: a pilot study. *Nano Letters*. 2020;20(9):6572-6581.
